# Supplementary material for: Pilot-Scale Production of the Natural Colorant Laetiporic Acid, Its Stability and Potential Applications
Source: MDPI journal article supplement (doi:10.3390/fermentation8120684), 2022-11-28
Supplement: s1 [file s1]

Archive with 1 entries (1 files):
- fermentation-2036464-supplementary.pdf
