# Supplementary material for: Pilot-Scale Production of the Natural Colorant Laetiporic Acid, Its Stability and Potential Applications
Source: MDPI journal article supplement (doi:10.3390/fermentation8120684), 2022-11-28
Supplement: s1 [file s1 › fermentation-2036464-supplementary.pdf]

# Pilot-scale Production of the Natural Colorant Laetiporic Acid, its Stability and Potential Applications

<sup>1</sup> Institute of Food Chemistry, Leibniz University Hannover, 30167 Hannover, Germany;  
<sup>2</sup> Institute of Natural Materials Technology, Technical University of Dresden, 01062 Dresden, Germany;  
\* Correspondence: pia.bergmann@ici.uni-hannover.de

1 L Moser b contains 30 g D-glucose monohydrate, 10 g malt extract, 2 g peptone, 0.15 g  $K_2HPO_4$ , 0.35 g  $KH_2PO_4$ , 1 g  $NH_4NO_3$ , 0.3 g  $NaNO_3$ , 0.5 g  $MgSO_4 \cdot 7 H_2O$ , 0.1 g  $CaCl_2$ , 1 mg biotin, 50 mg inositol, 18 mg  $ZnSO_4 \cdot 7 H_2O$ , 10 mg  $FeCl_3$ , 5.6 mg  $MnSO_4 \cdot H_2O$  and 50 mg thiamine hydrochloride.  
pH is not adjusted

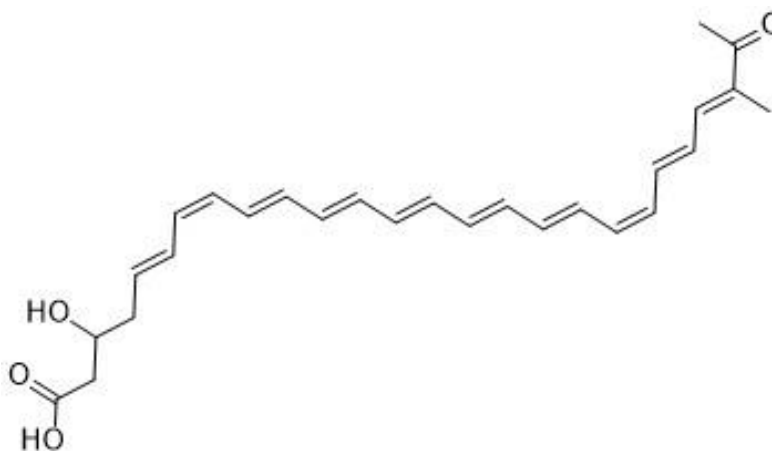

**Scheme S1.** Laetiporic acid A, the dominant pigment found in submerged cultures of *Laetiporus sulphureus*.

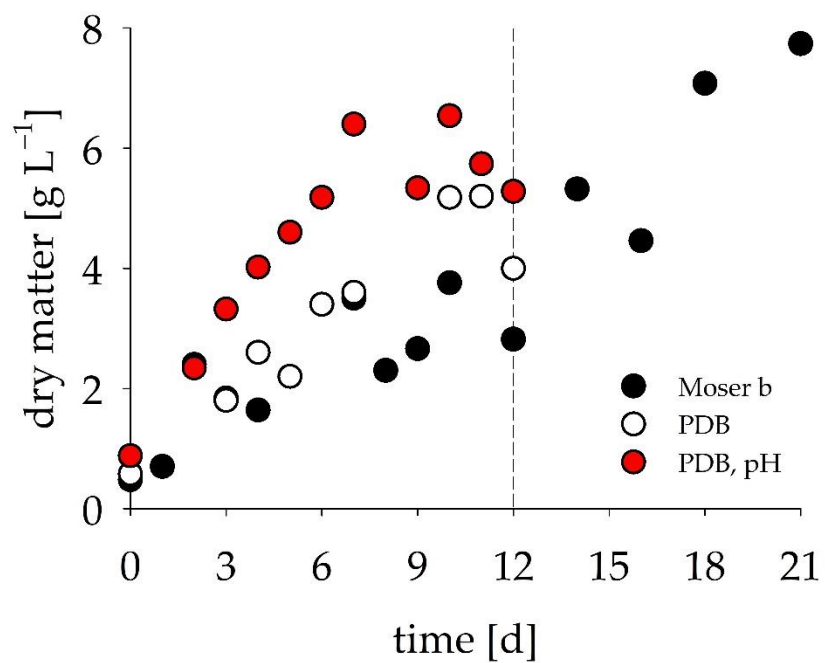

**Figure S1.** Influence of different media (Moser b and PDB) and pH regulation (PDB, pH) on biomass yield in a 7 L STR. The harvest of PDB cultures is marked with a dashed line.

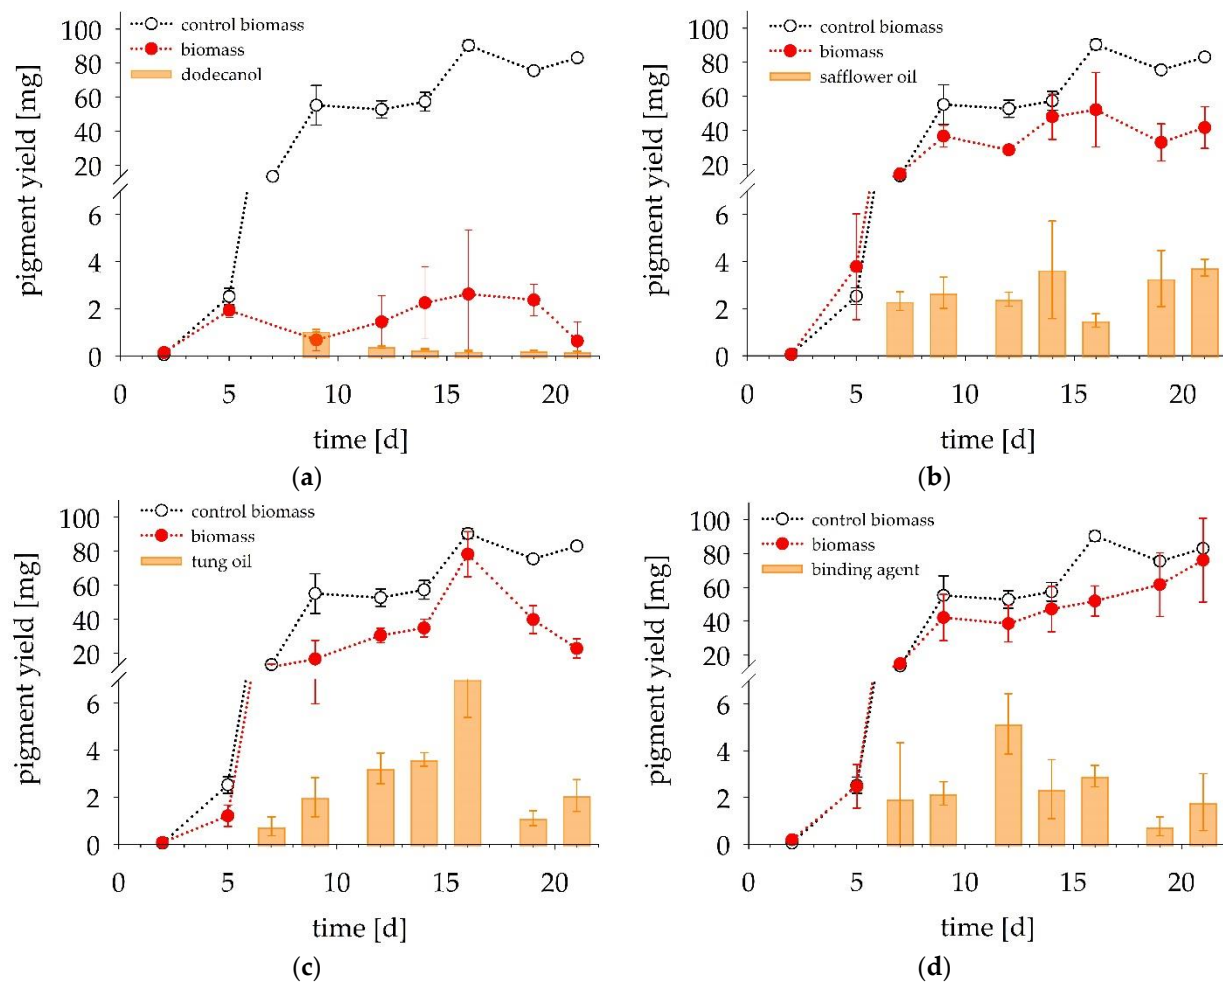

**Figure S2.** Laetiporic acid yields in biomass and lipophilic phase over the course of the cultivation during in situ extraction for (a) lauryl alcohol; (b) safflower oil; (c) tung oil and (d) binding agent. White dots depict the measurements for the control without second phase. The yield for the extractive phase on a certain day is the yield in the phase that was removed (and renewed) on that day of sampling.

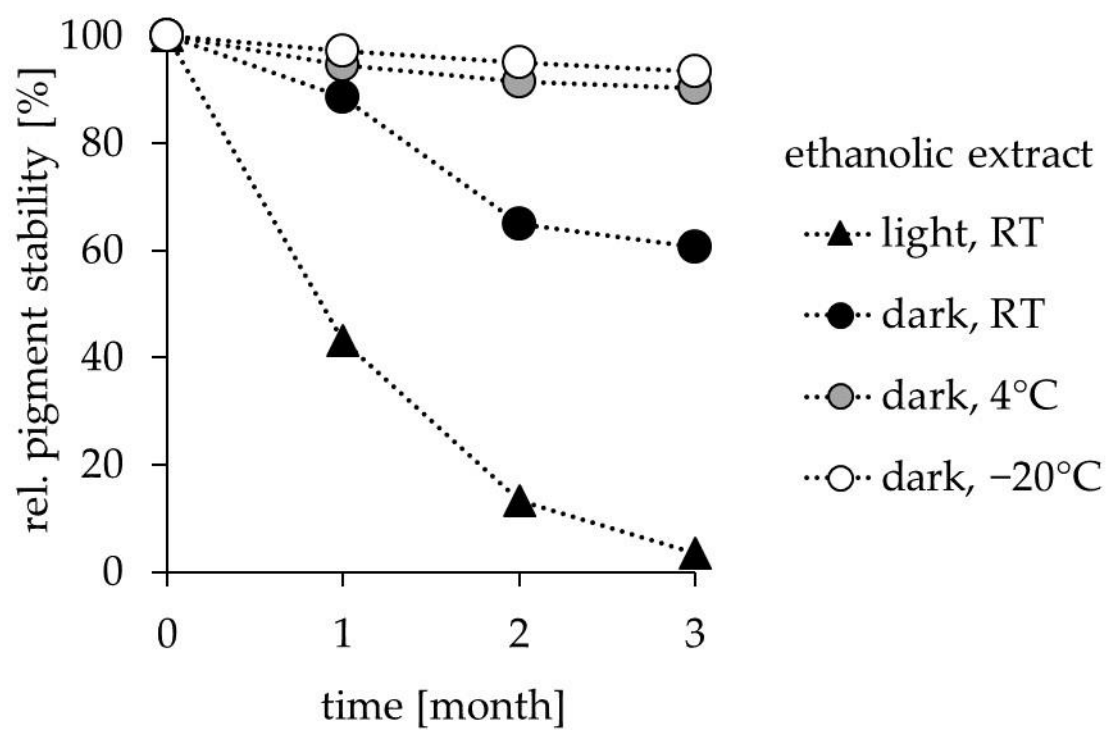

**Figure S3.** Preliminary stability trials with ethanolic *L. sulphureus* extracts stored under different conditions ( $n = 1$ ).

**Table S1.** Pictures of the silk samples over time. Samples were dyed with a) *L. sulphureus* dry matter and 1 % EtOH; b) *L. sulphureus* dry matter, vinegar and 1 % EtOH; c) *L. sulphureus* dry matter and 30 % EtOH; d) wet biomass and 1 % EtOH; e) dyer’s madder; f) commercially available textile dye; g) industrially dyed silk.

| time [h]  | 1                                                                                    | 6 | 12 | 24 | 48 |
|-----------|--------------------------------------------------------------------------------------|---|----|----|----|
| Reference | 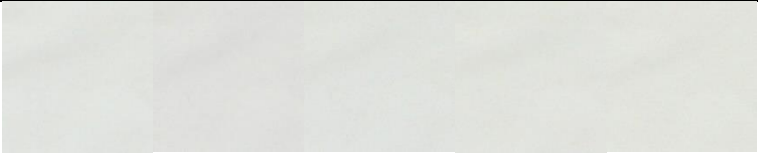   |   |    |    |    |
| a         | 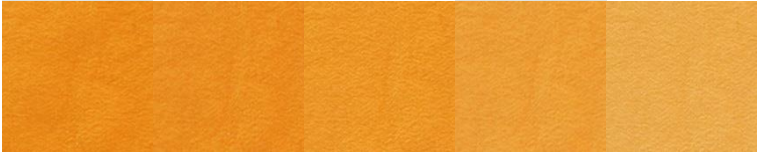   |   |    |    |    |
| b         | 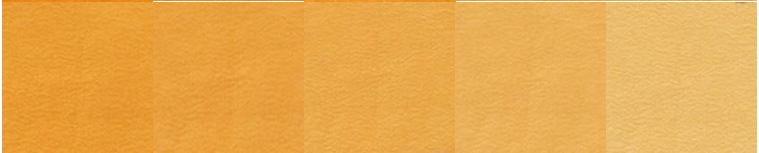   |   |    |    |    |
| c         | 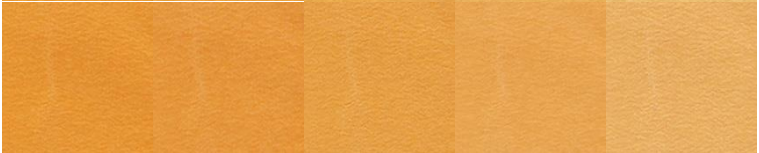   |   |    |    |    |
| d         | 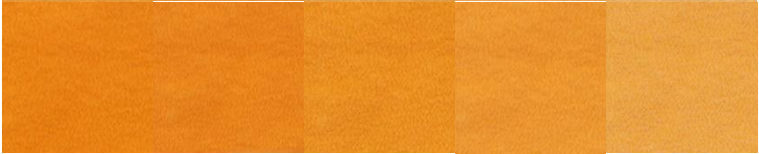  |   |    |    |    |
| e         | 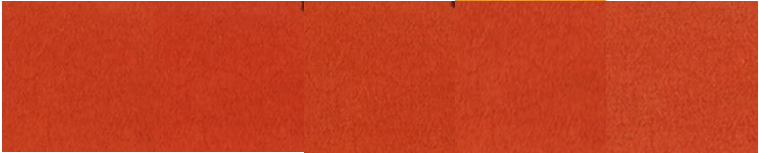 |   |    |    |    |
| f         | 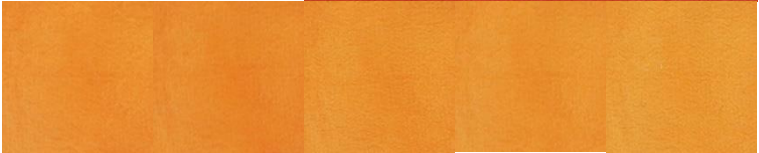 |   |    |    |    |
| g         | 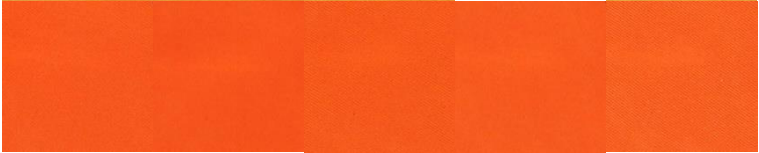 |   |    |    |    |
